1           **Genome-wide association studies in Samoans give insight into the genetic**  
2                                                           **architecture of fasting serum lipid levels**

3  
4     Jenna C. Carlson<sup>1,2\*</sup>, Daniel E. Weeks<sup>1,2¶</sup>, Nicola L. Hawley<sup>3</sup>, Guangyun Sun<sup>4</sup>, Hong  
5     Cheng<sup>4</sup>, Take Naseri<sup>5</sup>, Muagututi'a Sefuiva Reupena<sup>6</sup>; Ranjan Deka<sup>4¶</sup>, Stephen T.  
6     McGarvey<sup>7,8¶</sup>, Ryan L. Minster<sup>1¶</sup>

7  
8     <sup>1</sup> Department of Human Genetics, Graduate School of Public Health, University of  
9     Pittsburgh, Pittsburgh, Pennsylvania, United States of America

10  
11    <sup>2</sup> Department of Biostatistics, Graduate School of Public Health, University of Pittsburgh,  
12    Pittsburgh, Pennsylvania, United States of America

13  
14    <sup>3</sup> Department of Epidemiology, School of Public Health, Yale University, New Haven,  
15    Connecticut, United States of America

16  
17    <sup>4</sup> Department of Environmental Health, College of Medicine, University of Cincinnati,  
18    Cincinnati, Ohio, United States of America

19  
20    <sup>5</sup> Ministry of Health, Government of Samoa, Apia, Samoa

21  
22    <sup>6</sup> Lutia i Puava ae Mapu i Fangalele, Apia, Samoa

23  
24    <sup>7</sup> International Health Institute and Department of Epidemiology, School of Public  
25    Health, Brown University, Providence, Rhode Island, United States of America

26  
27    <sup>8</sup> Department of Anthropology, Brown University, Providence, Rhode Island, United  
28    States of America

29  
30    \* Corresponding Author

31    Email: [jnc35@pitt.edu](mailto:jnc35@pitt.edu)

32  
33    ¶ DEW, RD, STM, RLM are Joint Senior Authors

34

## 35 **Abstract**

36           The current understanding of the genetic architecture of lipids has largely come  
37 from genome-wide association studies. To date, few studies have examined the genetic  
38 architecture of lipids in Polynesians, and none have in Samoans, whose unique  
39 population history, including many population bottlenecks, may provide insight into the  
40 biological foundations of variation in lipid levels. Here we performed a genome-wide  
41 association study of four fasting serum lipid levels: total cholesterol (TC), high-density  
42 lipoprotein (HDL), low-density lipoprotein (LDL), and triglycerides (TG) in a sample of  
43 2,849 Samoans, with validation genotyping for associations in a replication cohort  
44 comprising 1,798 Samoans and American Samoans. We identified multiple genome-  
45 wide significant associations ( $P < 5 \times 10^{-8}$ ) previously seen in other populations –  
46 *APOA1* with TG, *CETP* with HDL, and *APOE* with TC and LDL – and several suggestive  
47 associations ( $P < 1 \times 10^{-5}$ ), including an association of variants downstream of *MGAT1*  
48 and *RAB21* with HDL. However, we observed different association signals for variants  
49 near *APOE* than what has been previously reported in non-Polynesian populations. The  
50 association with several known lipid loci combined with the newly-identified associations  
51 with variants near *MGAT1* and *RAB21* suggest that while some of the genetic  
52 architecture of lipids is shared between Samoans and other populations, part of the  
53 genetic architecture may be Polynesian-specific.

54

55 **Key words:** complex trait genetics; founder population genetics; lipids; genome-wide  
56 association study; Polynesia

## 57 **Introduction**

58           The Samoan Islands, comprising both the U.S. Territory of American Samoa  
59 (American Samoan) and the Independent State of Samoa (Samoa), have experienced a  
60 rise in prevalence of cardiovascular disease and other non-communicable diseases in  
61 the last 30 years partly due to economic modernization, rapid urbanization, and lifestyle  
62 changes such as increased caloric intake and sedentary behavior [1–3]. A 2010  
63 population-based survey in Samoa, which gathered the "discovery cohort" studied  
64 further here, found that many Samoans are at elevated risk of cardiovascular disease  
65 based on known risk factors—increased total cholesterol (TC), low-density lipoprotein  
66 cholesterol (LDL), and triglycerides (TG), as well as decreased high-density lipoprotein  
67 (HDL) [4–6]—with 47% of the 2,938 adult Samoans examined in the study having  
68 elevated TC ( $\geq 5.2$  mmol/L), 88% of men and 91% of women having elevated LDL ( $>$   
69 2.59 mmol/L), and 43% of women having low HDL ( $< 1.29$  mmol/L) [1].

70  
71           Our current understanding of the genetic component of serum lipid level variation  
72 has been largely due to genome-wide association studies (GWAS) [7]. The Global  
73 Lipids Genetics Consortium found strong evidence for 157 loci associated with one or  
74 more of these traits using a sample of 188,577 individuals of European, East Asian,  
75 South Asian, and African ancestry [8]. However, few GWAS of serum lipid levels have  
76 been conducted in Pacific Islanders [9, 10] and to our knowledge only one has included  
77 a small number of Polynesians [11]. Previous studies have estimated the heritability of  
78 serum lipid levels in Samoans, ranging from 16% for HDL to 23% for TG, and have  
79 identified genetic susceptibility loci via linkage analysis [12], warranting further study of

80 the genetic architecture of serum lipid levels in Samoans. Samoans are a genetically-  
81 isolated founder population, with unique evolutionary history, making them particularly  
82 useful in genomic studies [13, 14]. Thus, genomic studies of serum lipid levels could  
83 reveal novel lipid-altering loci specific to Pacific Islander populations, as well as highlight  
84 susceptibility loci shared with global populations.

85  
86 Here we report the results of a GWAS of fasting TC, LDL, HDL, and TG in up to  
87 2,849 individuals from independent Samoa followed by replication in up to 1,798  
88 individuals from independent Samoa and American Samoa, as part of ongoing genome-  
89 wide association studies of cardiometabolic disease and adiposity-related traits in the  
90 Samoan Islands [1]. We identified multiple genome-wide significant associations  
91 previously seen in other populations – *APOA1* with TG, *CETP* with HDL, and *APOE*  
92 with TC and LDL – and several suggestive associations, including an association  
93 between variants downstream of *MGAT1* and *RAB21* with HDL.

94

## 95 **Methods**

### 96 **Discovery Cohort and Genotyping**

97 The discovery cohort data are available from dbGaP (accession number:  
98 phs000914.v1.p1). The discovery cohort of 2,849 individuals is drawn from a  
99 population-based sample recruited from Samoa in 2010 (Table 1). The sample  
100 selection, data collection methods, and phenotyping, including the laboratory assays for  
101 serum lipid and lipoprotein levels, have been previously reported [1, 13]. Briefly, serum  
102 lipid levels were derived from fasting whole blood samples collected after a minimum

103 10-hour overnight fast. Genotyping was performed using Genome-Wide Human SNP  
104 6.0 arrays (Affymetrix). Extensive quality control was conducted on the basis of a  
105 pipeline developed by Laurie et al [15]. Additional details for sample genotyping and  
106 genotype quality control are described in Minster et al [13]. This study was approved by  
107 the institutional review board of Brown University and the Health Research Committee  
108 of the Samoa Ministry of Health. All participants gave informed consent. Imputation was  
109 not performed in this study because prior experience with this population using extant  
110 imputation panels such as the Phase 3 1000 Genomes panel showed that the resulting  
111 imputed genotypes did not correlate well with observed genotypes [13].

112

113 **Table 1. Demographic, anthropometric, and blood biochemistry statistics of the genotyped discovery and**  
 114 **replication cohorts.**

115

|                           | 2010 Discovery Cohort |                | 2002–2003 Replication Sample Set |               | 1994–1995 Replication Sample Set |               | 2002–2003 Replication Sample Set |                | 1994–1995 Replication Sample Set |                |
|---------------------------|-----------------------|----------------|----------------------------------|---------------|----------------------------------|---------------|----------------------------------|----------------|----------------------------------|----------------|
|                           | Samoa, n = 2849       |                | Samoa, n = 490                   |               | Samoa, n = 468                   |               | American Samoa, n = 592          |                | American Samoa, n = 248          |                |
|                           | Women                 | Men            | Women                            | Men           | Women                            | Men           | Women                            | Men            | Women                            | Men            |
|                           | n = 1703              | n = 1146       | n = 245                          | n = 245       | n = 243                          | n = 225       | n = 337                          | n = 255        | n = 137                          | n = 111        |
| age (years)               | 44.8 (11.10)          | 45.6 (11.10)   | 44 (17.00)                       | 40.7 (16.30)  | 43.3 (8.60)                      | 43.2 (8.90)   | 43 (16.00)                       | 43.2 (16.60)   | 43.3 (9.10)                      | 45.5 (10.60)   |
| BMI (kg/m <sup>2</sup> )  | 34.8 (6.70)           | 31.3 (5.90)    | 33.2 (7.70)                      | 28.8 (5.40)   | 31.9 (5.70)                      | 28.8 (5.00)   | 36.5 (8.40)                      | 33.4 (7.60)    | 37.4 (6.90)                      | 34.9 (6.00)    |
| total cholesterol (mg/dL) | 199.3 (36.10)         | 200.3 (38.70)  | 202.3 (35.90)                    | 195.5 (40.60) | 199.1 (37.20)                    | 197.4 (35.00) | 187.1 (38.60)                    | 189.6 (37.80)  | 197.8 (31.20)                    | 194.1 (31.00)  |
| HDL (mg/dL)               | 46.5 (10.80)          | 43.7 (11.20)   | 47.1 (10.30)                     | 46.3 (11.20)  | 43.4 (11.00)                     | 42.5 (11.40)  | 40.9 (8.80)                      | 40 (8.80)      | 34.8 (7.60)                      | 32.8 (8.30)    |
| LDL (mg/dL)               | 130 (32.60)           | 129.6 (35.30)  | 130.3 (32.80)                    | 128.6 (37.50) | 140.2 (34.80)                    | 133.5 (33.00) | 118.5 (33.70)                    | 118.9 (35.10)  | 136.6 (32.40)                    | 136 (37.50)    |
| triglycerides (mg/dL)     | 114.9 (80.50)         | 139.3 (113.10) | 110.9 (58.90)                    | 120.1 (91.30) | 85.6 (72.80)                     | 102.8 (97.20) | 130.8 (78.10)                    | 200.2 (206.50) | 118.9 (63.40)                    | 168.2 (109.00) |
| fasting glucose (mg/dL)   | 107.6 (56.20)         | 107.4 (54.80)  | 102.2 (46.40)                    | 98.6 (49.80)  | 90.9 (38.00)                     | 85.3 (18.90)  | 104.2 (50.30)                    | 108.8 (54.70)  | 107.3 (49.80)                    | 125.2 (61.70)  |

116

## 117 **Replication Cohort and Genotyping**

118           The replication cohort of 1,798 individuals contains two sample sets recruited  
119 from Samoa and American Samoa (Table 1). Although there is substantial economic  
120 variation across the two polities, with American Samoans generally having a higher  
121 standard of living, the Samoans from both territories form a single socio-cultural unit  
122 with frequent exchange of mates; genetically, they represent a single homogenous  
123 population [3, 16]. The first sample set, referred to as the 1990–95 replication sample  
124 set, contains 716 unrelated individuals derived from a longitudinal study of adiposity and  
125 cardiovascular disease risk factors among adults from American Samoa and Samoa  
126 (Table 1). Detailed descriptions of the sampling and recruitment have been reported  
127 previously [17–19]. Briefly, participants were recruited from 46 villages and worksites in  
128 American Samoa in 1990 and 9 villages in Samoa (Western Samoa, at the time of  
129 recruitment) in 1991 and followed up four years later in 1994 and 1995, respectively. All  
130 participants were, at baseline, free of self-reported history of heart disease,  
131 hypertension, or diabetes. This study was approved by the institutional review board of  
132 the Miriam Hospital, Providence, RI. All participants gave informed consent. The second  
133 sample set, referred to as the 2002–03 replication sample set, contains 1,082  
134 individuals from American Samoa and Samoa and was drawn from an extended family-  
135 based genetic linkage analysis of cardiometabolic traits (Table 1) [12, 20–23]. Probands  
136 and relatives were unselected for obesity or related phenotypes. The recruitment  
137 process and criteria used for inclusion in this study have been described in detail  
138 previously [21, 23]. This study was approved by the institutional review board of Brown  
139 University and research ethics review committees in both Samoa and American Samoa.

140 All participants gave informed consent. Imputation was not performed in these studies  
141 for the same rationale as the discovery cohort above, but also because genome-wide  
142 marker data was not available for the samples in these studies.

143  
144 In both replication sample sets, blood samples were collected in the morning  
145 after a minimum of 10 hours fasting, from which serum lipid levels were derived using  
146 assay methods published previously [12, 17]. Genotyping of variants selected for  
147 validation in the replication cohort (described below) was performed using custom-  
148 designed TaqMan OpenArray Real-Time PCR assays (Applied Biosystems). SNPs that  
149 could not be genotyped using OpenArray assays were genotyped individually using  
150 TaqMan SNP Genotyping assays (Applied Biosystems). Eight variants could not be  
151 genotyped due to technical difficulties.

152

## 153 **Statistical Analyses**

154 Prior to association analyses, residuals were generated for all four lipid traits.  
155 First, traits were transformed to normality with the Box–Cox power transformation;  
156 secondly, model selection was performed using step-wise linear regression with initial  
157 model covariates previously associated with serum lipid levels: age, age<sup>2</sup>, sex, log-  
158 transformed BMI, fasting glucose, smoking status, farming status (as a measure of  
159 physical activity), and interactions between age, age<sup>2</sup>, and sex. The final TC model  
160 adjusted for age, age<sup>2</sup>, sex, age × sex, and age<sup>2</sup> × sex; the final LDL and TG models  
161 adjusted for age, age<sup>2</sup>, sex, and age<sup>2</sup> × sex; the final HDL model adjusted for age and  
162 sex.



163

164 Preliminary associations were performed, and variants were selected for  
165 validation without consideration of hypolipidemic medication use, as it was not  
166 measured. However, participants did self-report use of heart disease medication.  
167 Sensitivity analysis revealed that this self-reported use of medication to treat heart  
168 disease was significantly associated with TC and LDL (results not shown); individuals  
169 reporting such medication use ( $n = 17$ ) were excluded from analyses. The prioritization  
170 of variants for validation genotyping was updated using these analyses, but only after  
171 available resources were fully expended. Unfortunately, not all variants that should have  
172 been prioritized for validation genotyping were successfully genotyped. All results  
173 presented are those of the corrected analyses, removing the individuals with heart  
174 disease medication use.

175

176 Additional sensitivity analysis was performed for TG by excluding one outlying  
177 observation (i.e., TG > 4 standard deviations above mean); results did not change  
178 qualitatively, and, since the recorded value was within the range of plausible values for  
179 TG, the individual was retained for presented analyses.

180

181 Association between lipid residuals and autosomal genotypes of 659,492 SNPs  
182 with minor allele frequency (MAF)  $\geq 0.05$  and Hardy-Weinberg Equilibrium (HWE) test  $P$   
183 value  $\geq 5 \times 10^{-5}$  was assessed using linear mixed modelling in GenABEL, including  
184 previously-derived empirical kinship estimates to adjust for subject relatedness [13, 24].  
185 The association between X-chromosome genotypes and the lipid phenotypes were

186 calculated in GenABEL, without adjustment using the empirical kinship estimates.  
187 Genomic inflation due to population stratification and cryptic relatedness was assessed  
188 by estimating  $\lambda_{GC}$  using the lower 90% of the  $P$  value distribution [25]. GWAS  $P$  values  
189 in the discovery cohort ( $P_D$ ) were compared to a threshold for genome-wide significance  
190 of  $P_D < 5 \times 10^{-8}$  and a suggestive association threshold of  $P_D < 1 \times 10^{-5}$ . Statistical  
191 power to detect signals at these thresholds was calculated using the Genetic Power  
192 Calculator [26].

193  
194 Gene-set enrichment analysis with MAGENTA was also performed to identify any  
195 biological pathways enriched for discovery association signals [27]. Briefly, gene scores  
196 were obtained from the most significant  $P$  value among SNPs located within each gene  
197 using the association results from each lipid GWAS. Gene scores were adjusted for  
198 confounding factors including gene size, number of variants, and linkage disequilibrium-  
199 related properties by using step-wise multiple linear regression. The 95th percentile of  
200 all gene scores was used as the enrichment cutoff for each trait [28]. Gene-set  
201 enrichment  $P$  values were obtained for highly ranked gene scores. Gene sets were  
202 obtained from Gene Ontology (April 2010), pathway information from the Ingenuity  
203 (June 2008) and KEGG (June 2010), and biological processes and molecular function  
204 from PANTHER (January 2010).

205  
206 For each of the lipid traits, the INRICH program [29] was used to test for  
207 enrichment of known genes (as constructed from Teslovich et al. [30] and Willer et al  
208 [8]). INRICH tests if more known genes are contained in associated intervals than

209 expected by chance, using permutation based on 1 million replicates to generate  
210 experiment-wide empirical  $P$  values. For each lipid trait, we defined the associated  
211 intervals as 100 kb intervals centered on the most significant SNP within association  
212 peaks with  $P_D < 1 \times 10^{-4}$ .

213  
214 We selected 21 regions demonstrating at least suggestive association for  
215 association validation in the replication cohort. An additional 10 regions which should  
216 have selected for validation were not followed-up because their exclusion was based on  
217 preliminary analyses that included 17 participants taking heart disease medication—  
218 participants who were ultimately excluded from these studies. The variant from each  
219 locus with smallest  $P$  value across the four lipid scans (defined as 1 Mb windows  
220 surrounding the peak SNP) or a proxy SNP in high linkage disequilibrium with the  
221 lowest- $P$  value SNP was selected as representative of the locus for replication  
222 genotyping.

223  
224 Statistical association was measured in the 1990–95 and 2002–03 replication  
225 sample sets independently, and results were combined using meta-analysis (see  
226 below). Association analyses for both sample sets were performed using GenABEL [31]  
227 in R [32], using the same regression models as in the discovery cohort but additionally  
228 adjusting for polity (American Samoa or Samoa); the 2002-03 sample set was  
229 additionally adjusted using expected kinship, as derived from familial pedigree  
230 information [33].

231

232 Prior to meta-analysis, quality control was performed using EasyQC to check for  
233 strand and allele frequency consistency [34].  $P$  value-based meta-analysis using  
234 sample sizes as weights was performed using METAL [35] to generate two  $P$  values:  
235 one for the meta-analysis of the two replication cohorts ( $P_R$ ) and one for the replication  
236 cohorts and discovery sample together ( $P_{DR}$ ). Resulting meta-analysis signals were  
237 evaluated based on genome-wide significance and suggestive thresholds (as described  
238 above) and by the contribution of the replication sample to the signal. Effect directions  
239 for meta-analysis results of peak SNPs were qualitatively compared to those of  
240 previously reported lead SNPs.

241  
242 For ease of reference, any locus identified here with a corresponding signal  
243 within 1 mega base pairs (Mb) in a prior lipid study is referred to by the previously  
244 prescribed locus name [8, 10]; for loci not previously associated with lipid traits, the  
245 symbol of the gene nearest the peak SNP in the locus or the hyphen-separated symbols  
246 of the nearest two genes is used as the locus label.

247

## 248 **Results**

249 The demographic, anthropometric, and biochemical characteristics of the 2,849  
250 participants composing the discovery cohort for this GWAS of serum lipids levels and  
251 the 1,798 participants composing the replication cohort are presented in Table 1. A  
252 detailed description of the discovery cohort and its trends compared to the historical  
253 sample sets making up the replication cohort has been previously reported [1]. Briefly,  
254 the average age was similar for all cohorts; average BMI was higher among women

255 compared to men and in American Samoa compared to Samoa; average BMI for men  
256 and women in Samoa was higher in more recent studies; average lipid levels are largely  
257 similar across cohorts with minor exceptions.

258  
259 We assessed 659,492 unique genome-wide markers for association with 4  
260 traits—TC, HDL, LDL and TG—in up to 2,849 Samoans in the discovery cohort.  
261 Relatedness within the discovery cohort was well-controlled using the empirical kinship  
262 coefficients;  $\lambda_{GC}$  ranged between 1.03 and 1.07 for the four lipid traits (Figs S2, S4, S6,  
263 and S8 in S1 Appendix). We observed 38 genome-wide suggestive or significant  
264 associations across 31 loci from the four GWAS (Fig 1; Figs S1, S3, S5, and S7 in S1  
265 Appendix; Tables S1, S7, S10, and S13 in S1 Appendix).

266  
267 **Fig 1. Manhattan plots for GWAS of four lipid traits in the discovery cohort of**  
268 **2,849 Samoans.** The dashed and solid lines denote genome-wide suggestive and  
269 genome-wide significant  $P$  value thresholds ( $P < 1 \times 10^{-5}$  and  $P < 5 \times 10^{-8}$ ,  
270 respectively). Peaks are labeled with the candidate gene or closest gene in the region if  
271 they have at least suggestive association in the discovery cohort for at least one trait  
272 and demonstrate evidence of replication or have been previously associated.

273  
274 Genome-wide significant association was observed in the discovery cohort  
275 between all four traits and markers near *APOE*: TC and rs4420638 ( $P_D = 2.67 \times 10^{-16}$ ,  
276 Fig 2E); HDL and rs4420638 ( $P_D = 9.07 \times 10^{-9}$ , Fig 2F); LDL and rs1160985 ( $P_D = 2.61$   
277  $\times 10^{-20}$ ; Fig 2G); and TG and rs4420638 ( $P_D = 7.44 \times 10^{-10}$ , Fig 2H). Additionally, HDL

278 was associated with markers near *CETP* ( $rs289708$ ,  $P_D = 1.19 \times 10^{-11}$ ), and TG, with  
279 *APOA1* ( $rs6589566$ ,  $P_D = 3.98 \times 10^{-18}$ , Fig 2C). Suggestive associations were observed  
280 between lipid levels and markers at an additional 28 loci, including the *MGAT1* and  
281 *RAB21* loci and HDL (Fig 2A,D), and *APOA1* with TC ( $rs3741298$ ,  $P_D = 1.63 \times 10^{-7}$ , Fig  
282 2B). We had 80% power at  $\alpha = 1 \times 10^{-5}$  and  $\alpha = 5 \times 10^{-8}$  to detect SNPs that account  
283 for 1.0% and 1.5%, respectively, of the residual variance in a phenotype.

284

285 **Fig 2. Regional association plots for selected loci.** Regional association plots  
286 generated in LocusZoom [36] showing  $-\log_{10}(P \text{ values})$  for SNPs in the (A) *MGAT1*  
287 locus and HDL, (B) *APOA1* locus and TC, (C) *APOA1* locus and TG, (D) *RAB21* locus  
288 and HDL, and the *APOE* locus and (E) TC, (F) HDL, (G) LDL, and (H) TG. Points are  
289 color coded within each plot according to pairwise linkage disequilibrium ( $r^2$ ) with the  
290 labeled SNPs; the saturation of the color of each plotted SNP measures the linkage  
291 disequilibrium ( $r^2$ ) with the labeled SNP sharing the same color.

292

293 Gene-set enrichment analysis with MAGENTA highlighted, at a  $< 5\%$  false-  
294 discovery rate (FDR), several lipid homeostasis pathways and gene ontologies for HDL  
295 and TG (Tables S8 and S14 in S1 Appendix). Four gene sets were below the FDR for  
296 both HDL and TG: HDL particle remodeling, reverse cholesterol transport, cholesterol  
297 efflux, and phospholipid efflux. An additional 12 gene sets were implicated for HDL and  
298 three gene sets for TG. The HDL particle remodeling and reverse cholesterol transport  
299 gene sets had significant enrichment for TC (Table S3 in S1 Appendix), and a single  
300 gene set was implicated with LDL, the amylase pathway (Table S11 in S1 Appendix). All

301 four traits had significant enrichment for known TC, HDL, LDL, and TG loci using the  
302 INRICH method (Tables S5, S9, S12, and S15 in S1 Appendix).

303  
304 Validation of peak SNPs was attempted for 21 loci. At loci with multiple  
305 associated variants, the most significant variant was chosen as representative of the  
306 locus. For some loci, the exclusion of participants using self-reported heart disease  
307 medication resulted in a different peak SNP. Thus, for the *APOE* locus rs1160985 was  
308 genotyped instead of rs4420638 ( $P_D = 2.67 \times 10^{-16}$  for TC,  $P_D = 9.07 \times 10^{-9}$  for HDL,  
309 and  $P_D = 7.44 \times 10^{-10}$  for TG); for the *APOA1* locus rs964184 was genotyped instead of  
310 rs3741298 ( $P_D = 1.63 \times 10^{-7}$  for TC) or rs6589566 ( $P_D = 3.98 \times 10^{-18}$  for TG); for the  
311 *MGAT1* locus rs1038143 was genotyped instead of rs249356 ( $P_D = 1.06 \times 10^{-6}$  for  
312 HDL); for the *APOB* locus rs754523 was genotyped instead of rs1469513 ( $P_D = 2.71 \times$   
313  $10^{-6}$  for LDL).

314  
315 We successfully genotyped the peak SNP, or a proxy SNP, in the replication  
316 cohorts for 15 loci. Two loci (*APOA1* with TG,  $P_{DR} = 1.81 \times 10^{-29}$ ; *APOE* with TC,  $P_{DR} =$   
317  $4.29 \times 10^{-21}$ , and LDL,  $P_{DR} = 1.53 \times 10^{-27}$ ) demonstrated genome-wide significant  
318 associations in the discovery-replication meta-analysis (Table 2 and Tables S1, S7,  
319 S10, and S13 in S1 Appendix). An additional four associations demonstrated evidence  
320 of replication with consistent directions of effect and suggestive joint  $P_{DR}$  values (*GCKR*  
321 with TG,  $P_{DR} = 5.62 \times 10^{-8}$ ; *MGAT1* with HDL,  $P_{DR} = 2.91 \times 10^{-7}$ ; *APOA1* with TC,  $P_{DR} =$   
322  $1.72 \times 10^{-6}$ ; *RAB21* with HDL,  $P_{DR} = 5.92 \times 10^{-7}$ ). Three associations had suggestive  
323 joint  $P_{DR}$  values driven by the discovery associations only (*APOB* with LDL,  $P_{DR} = 5.81 \times$

324  $10^{-6}$ ; *LIPC* with HDL,  $P_{DR} = 9.15 \times 10^{-7}$ ; *CDH4* with HDL,  $P_{DR} = 8.77 \times 10^{-6}$ ;  
325 associations at *APOB* and *CDH4* had consistent directions of effect. Among the  
326 remaining loci with at least suggestive association in the discovery sample, but not in  
327 the discovery-replication meta-analysis, consistent effect directions were also seen for  
328 TC and *APOB* and *ZHX2*; LDL and *ALG10* and *CPNE8* (Table 2 and Tables S1, S7,  
329 S10, and S13 in S1 Appendix).



330 **Table 2. Suggestive loci and replication genotyping**

331

| Total Cholesterol    |            |     |           |    |    |     |                 |                 |                 |              |         |       |       |       |       |       |       |  |
|----------------------|------------|-----|-----------|----|----|-----|-----------------|-----------------|-----------------|--------------|---------|-------|-------|-------|-------|-------|-------|--|
| Locus                | SNP        | Chr | BP        | EA | OA | Dir | $P_D$           | $P_R$           | $P_{DR}$        | Known gene   | Traits  | SAM   | EAS   | SAS   | EUR   | AMR   | AFR   |  |
| <i>APOB</i>          | rs754523   | 2   | 21311691  | G  | A  | +++ | <b>6.25E-06</b> | 0.178           | 1.20E-05        | <i>APOB</i>  | C,H,L,T | 0.247 | 0.265 | 0.140 | 0.309 | 0.306 | 0.201 |  |
| <i>PDE4D</i>         | rs7711093  | 5   | 59593138  | G  | A  | ++- | <b>3.01E-06</b> | 0.747           | 5.37E-04        |              |         | 0.506 | 0.643 | 0.553 | 0.856 | 0.775 | 0.852 |  |
| <i>LUCAT1</i>        | rs10072084 | 5   | 90539203  | C  | T  | +.. | <b>9.48E-06</b> |                 |                 |              |         | 0.541 | 0.559 | 0.422 | 0.232 | 0.429 | 0.822 |  |
| <i>FILIP1**</i>      | rs2951921  | 6   | 76165524  | T  | C  | +.. | <b>9.04E-07</b> |                 |                 |              |         | 0.073 | 0.022 | 0.063 | 0.015 | 0.030 | 0.293 |  |
| <i>ZHX2</i>          | rs7841763  | 8   | 123971081 | T  | C  | +++ | <b>4.82E-06</b> | 0.631           | 1.03E-04        |              |         | 0.043 | 0.023 | 0.146 | 0.102 | 0.058 | 0.169 |  |
| <i>APOA1</i>         | rs964184*  | 11  | 116648917 | C  | G  | +++ | <b>5.37E-05</b> | 0.009           | <b>1.72E-06</b> | <i>APOA1</i> | C,H,L,T | 0.560 | 0.760 | 0.771 | 0.838 | 0.723 | 0.779 |  |
| <i>SIRT2</i>         | rs10405150 | 19  | 39387919  | C  | T  | +.. | <b>6.34E-06</b> |                 |                 |              |         | 0.056 | 0.147 | 0.144 | 0.081 | 0.117 | 0.774 |  |
| <i>ZNF283</i>        | rs16976816 | 19  | 44339377  | G  | A  | +.. | <b>9.78E-06</b> |                 |                 |              |         | 0.977 | 0.970 | 0.994 | 0.987 | 0.976 | 0.864 |  |
| <i>APOE</i>          | rs1160985* | 19  | 45403412  | C  | T  | +++ | <b>2.13E-13</b> | <b>3.36E-09</b> | <b>4.29E-21</b> | <i>APOE</i>  | C,H,L,T | 0.724 | 0.659 | 0.590 | 0.554 | 0.447 | 0.378 |  |
| HDL                  |            |     |           |    |    |     |                 |                 |                 |              |         |       |       |       |       |       |       |  |
| Locus                | SNP        | Chr | BP        | EA | OA | Dir | $P_D$           | $P_R$           | $P_{DR}$        | Known gene   | Traits  | SAM   | EAS   | SAS   | EUR   | AMR   | AFR   |  |
| <i>STON1-GTF2A1L</i> | rs6739536  | 2   | 48831901  | A  | G  | -.. | <b>1.58E-06</b> |                 |                 |              |         | 0.762 | 0.676 | 0.837 | 0.918 | 0.842 | 0.609 |  |
| <i>MGAT1</i>         | rs1038143* | 5   | 180213878 | T  | C  | --- | <b>3.72E-06</b> | 0.016           | <b>2.91E-07</b> |              |         | 0.309 | 0.110 | 0.137 | 0.148 | 0.081 | 0.013 |  |
| <i>AKAP7</i>         | rs3777486  | 6   | 131584648 | G  | A  | ++- | <b>3.09E-06</b> | 0.808           | 4.37E-04        |              |         | 0.976 | 0.909 | 0.898 | 0.858 | 0.793 | 0.949 |  |
| <i>CSMD1</i>         | rs1626142  | 8   | 4345284   | T  | C  | -.. | <b>7.67E-06</b> |                 |                 |              |         | 0.612 | 0.400 | 0.435 | 0.298 | 0.392 | 0.654 |  |
| <i>RAB21</i>         | rs328733   | 12  | 72197574  | T  | C  | --- | <b>2.57E-06</b> | 0.036           | <b>5.92E-07</b> |              |         | 0.788 | 0.626 | 0.700 | 0.869 | 0.738 | 0.611 |  |
| <i>ZNF10</i>         | rs2292029  | 12  | 133734113 | A  | G  | -.. | <b>4.05E-06</b> |                 |                 |              |         | 0.179 | 0.112 | 0.254 | 0.245 | 0.156 | 0.008 |  |
| <i>HS6ST3</i>        | rs16953620 | 13  | 97508453  | A  | G  | -.. | <b>8.48E-06</b> |                 |                 |              |         | 0.968 | 0.950 | 0.949 | 0.848 | 0.911 | 0.836 |  |
| <i>LIPC</i>          | rs10438284 | 15  | 58629424  | G  | A  | +-  | <b>4.00E-07</b> | 0.133           | <b>9.15E-07</b> | <i>LIPC</i>  | C,H,T   | 0.286 | 0.326 | 0.173 | 0.272 | 0.199 | 0.047 |  |
| <i>CETP</i>          | rs289708   | 16  | 57038162  | T  | C  | -.. | <b>1.19E-11</b> |                 |                 | <i>CETP</i>  | C,H,L,T | 0.905 | 0.815 | 0.800 | 0.860 | 0.823 | 0.597 |  |
| <i>LIPG</i>          | rs16950739 | 18  | 47138509  | C  | T  | -.. | <b>1.07E-07</b> |                 |                 | <i>LIPG</i>  | C,H     | 0.019 | 0.058 | 0.190 | 0.057 | 0.140 | 0.004 |  |
| <i>APOE</i>          | rs1160985* | 19  | 45403412  | C  | T  | +-  | 0.003           | 0.342           | 0.004           | <i>APOE</i>  | C,H,L,T | 0.724 | 0.659 | 0.590 | 0.554 | 0.447 | 0.378 |  |
| <i>CDH4</i>          | rs817687   | 20  | 59753355  | A  | G  | --- | <b>2.31E-06</b> | 0.237           | <b>8.77E-06</b> |              |         | 0.986 | 0.924 | 0.945 | 0.967 | 0.855 | 0.610 |  |
| LDL                  |            |     |           |    |    |     |                 |                 |                 |              |         |       |       |       |       |       |       |  |
| Locus                | SNP        | Chr | BP        | EA | OA | Dir | $P_D$           | $P_R$           | $P_{DR}$        | Known gene   | Traits  | SAM   | EAS   | SAS   | EUR   | AMR   | AFR   |  |
| <i>APOB</i>          | rs754523*  | 2   | 21311691  | G  | A  | +++ | <b>3.25E-06</b> | 0.158           | <b>5.81E-06</b> | <i>APOB</i>  | C,H,L,T | 0.247 | 0.265 | 0.140 | 0.309 | 0.306 | 0.201 |  |
| <i>KALRN</i>         | rs6789134  | 3   | 123942339 | G  | A  | ++- | <b>3.22E-06</b> | 0.925           | 1.96E-04        |              |         | 0.078 | 0.161 | 0.120 | 0.046 | 0.118 | 0.212 |  |
| <i>ZHX2</i>          | rs7841763  | 8   | 123971081 | T  | C  | ++- | <b>1.80E-06</b> | 0.557           | 3.78E-05        |              |         | 0.043 | 0.023 | 0.146 | 0.102 | 0.058 | 0.169 |  |
| <i>SH2D4B</i>        | rs10509415 | 10  | 82473065  | A  | C  | +.. | <b>7.96E-06</b> |                 |                 |              |         | 0.706 | 0.510 | 0.735 | 0.758 | 0.808 | 0.708 |  |
| <i>ALG10</i>         | rs3912355  | 12  | 34079616  | C  | T  | +++ | <b>2.12E-06</b> | 0.544           | 3.97E-05        |              |         | 0.855 | 0.872 | 0.651 | 0.605 | 0.732 | 0.863 |  |
| <i>ALG10B</i>        | rs10880642 | 12  | 38554152  | A  | G  | +.. | <b>5.56E-06</b> |                 |                 |              |         | 0.802 | 0.715 | 0.555 | 0.481 | 0.532 | 0.299 |  |
| <i>CPNE8</i>         | rs11169807 | 12  | 39244161  | C  | T  | +++ | <b>4.77E-06</b> | 0.418           | 4.13E-05        |              |         | 0.794 | 0.644 | 0.536 | 0.505 | 0.408 | 0.898 |  |
| <i>LINC02408</i>     | rs17104016 | 12  | 67969929  | A  | T  | +.. | <b>9.29E-06</b> |                 |                 |              |         | 0.574 | 0.734 | 0.924 | 0.853 | 0.906 | 0.838 |  |
| <i>LINC00922</i>     | rs254371   | 16  | 65943650  | T  | C  | +.. | <b>9.04E-06</b> |                 |                 |              |         | 0.555 | 0.698 | 0.650 | 0.599 | 0.693 | 0.884 |  |
| <i>ZNF283</i>        | rs16976816 | 19  | 44339377  | G  | A  | +.. | <b>1.78E-06</b> |                 |                 |              |         | 0.977 | 0.970 | 0.994 | 0.987 | 0.976 | 0.864 |  |
| <i>APOE</i>          | rs1160985  | 19  | 45403412  | C  | T  | +++ | <b>2.61E-20</b> | <b>5.07E-09</b> | <b>1.53E-27</b> | <i>APOE</i>  | C,H,L,T | 0.724 | 0.659 | 0.590 | 0.554 | 0.447 | 0.378 |  |

Triglycerides

| Locus          | SNP        | Chr | BP        | EA | OA | Dir | $P_D$    | $P_R$    | $P_{DR}$ | Known gene   | Traits  | SAM   | EAS   | SAS   | EUR   | AMR   | AFR   |
|----------------|------------|-----|-----------|----|----|-----|----------|----------|----------|--------------|---------|-------|-------|-------|-------|-------|-------|
| <i>GCKR</i>    | rs780094   | 2   | 27741237  | T  | C  | +++ | 9.84E-07 | 0.01     | 5.62E-08 | <i>GCKR</i>  | C,T     | 0.334 | 0.476 | 0.198 | 0.411 | 0.360 | 0.132 |
| <i>CD200</i>   | rs2399416  | 3   | 112059213 | A  | G  | ++- | 5.12E-06 | 0.668    | 9.29E-04 |              |         | 0.021 | 0.148 | 0.140 | 0.393 | 0.272 | 0.101 |
| <i>SPIN1</i>   | rs7861888  | 9   | 90886340  | A  | G  | +.. | 4.24E-06 |          |          |              |         | 0.706 | 0.719 | 0.897 | 0.921 | 0.842 | 0.989 |
| <i>APOA1</i>   | rs964184*  | 11  | 116648917 | C  | G  | +++ | 2.37E-17 | 8.97E-14 | 1.81E-29 | <i>APOA1</i> | C,H,L,T | 0.440 | 0.240 | 0.229 | 0.162 | 0.277 | 0.221 |
| <i>KIRREL3</i> | rs3018434  | 11  | 126805881 | G  | A  | +.. | 4.16E-06 |          |          |              |         | 0.916 | 0.803 | 0.920 | 0.866 | 0.857 | 0.974 |
| <i>APOE</i>    | rs1160985* | 19  | 45403412  | T  | C  | ++- | 0.312    | 0.836    | 0.507    | <i>APOE</i>  | C,H,L,T | 0.276 | 0.341 | 0.410 | 0.446 | 0.553 | 0.623 |

332

333

EA = effect allele

334

OA = other allele (reference allele)

335

Dir = direction of the effect in each of the four samples (+ indicates the effect allele is increasing the trait value on the raw scale)

336

$P_D$  = discovery cohort GWAS  $p$ -value

337

$P_R$  = replication cohort  $p$ -value

338

$P_{DR}$  = joint discovery and replication cohorts  $p$ -value

339

Known gene = Loci observed in Teslovich et al. 2010 or Willer et al. 2013

340

Traits = Traits locus associated with in Teslovich et al. 2010 or Willer et al. 2013

341

C = TC

342

H = HDL

343

L = LDL

344

T = TG

345

SAM = Samoan effect allele frequency (EAF)

346

EAS = East Asian EAF

347

SAS = South Asian EAF

348

EUR = European EAF

349

AMR = Admixed American EAF

350

AFR = African EAF

351

352

\*The SNP genotyped in the replication population was not the peak SNP at this locus for this trait.

353

354 We compared the directions of effect to those previously reported in Willer et al.  
355 [8] and Teslovich et al. [30] for *APOB*, *GCKR*, *APOA1*, *LIPC*, *LIPG*, and *APOE* (i.e.,  
356 genome-wide suggestive loci that have been previously associated with lipid traits). We  
357 observed a consistent direction of effect for the representative SNP for all associations  
358 except for *LIPG* and HDL (Table 2).

359

360 The effect allele frequencies in the two samples—discovery and replication—  
361 were largely similar for each of the 15 successfully genotyped SNPs (Tables S1, S7,  
362 S10, and S13 Appendix). However, many loci had markedly different effect allele  
363 frequencies between Samoans and other 1000 Genomes populations (Table 2). For  
364 example, compared to 1000 Genomes populations, there were higher effect allele  
365 frequencies (EAFs) in Samoans for rs964184 near *APOA1* (G allele frequency: 0.440 in  
366 Samoans vs. < 0.277 in 1000 Genomes populations), rs1160985 near *APOE* (C allele  
367 frequency: 0.724 in Samoans vs. < 0.659 in 1000 Genomes populations), and  
368 rs1038143 near *MGAT1* (A allele frequency: 0.309 in Samoans vs. < 0.148 in 1000  
369 Genomes populations).

370

371

## 372 Discussion

373 In this study, we examined four measures of fasting lipid levels—TC, HDL, LDL  
374 and TG—for associations with 659,492 SNPs from a genome-wide array in a discovery  
375 cohort of 2,849 Samoans, with follow-up genotyping of significant and suggestive  
376 findings in a replication cohort comprising 1,798 Samoans from Samoa and American

377 Samoa. Thirty-one loci had at least suggestive evidence of association with one or more  
378 lipid traits in the discovery cohort, of which eight have been reported to be associated  
379 with lipid levels previously: *APOB*, *GCKR*, *MGAT1*, *APOA1*, *LIPC*, *CETP*, *LIPG*, and  
380 *APOE* [8, 10, 30] although the direction of effect for the variant near *LIPG* was in the  
381 opposite direction from previous results. Enrichment analyses highlighted known lipid  
382 metabolism gene sets and previously associated lipid loci.

383

384 We observed a difference in the architecture of the statistical association signals  
385 between the four lipid traits and variants near *APOE* (Fig 2E-H). The peak SNP for TC  
386 and LDL was rs1160985, an intronic variant in *TOMM40* upstream of *APOE*; whereas  
387 the peak SNP for HDL and TG was rs4420638, an intergenic variant downstream of  
388 *APOC1* and *APOE*. rs1160985 demonstrated evidence of replication for TC and LDL  
389 but not for HDL and TG, consistent with the discovery findings. These markers are in  
390 low linkage disequilibrium with each other ( $r^2 = 0.093$ ) and may represent distinct  
391 association signals. While this could support a shared genetic architecture for TC and  
392 LDL and for HDL and TG in Polynesians, this study was not positioned to adequately  
393 capture the association signal present at this locus. Future studies with sequencing or  
394 imputation of the 19q13.2 region will be necessary to dissect the genetic architecture of  
395 *APOE* and lipid levels in Polynesians.

396

397 We did not observe suggestive or genome-wide significant association with  
398 several loci which have figured prominently in multiple lipid GWAS (e.g., *LPL*, *LDLR*,  
399 *CILP2*, *FADS1/2/3*, *ANGPTL3*, *SORT1*, *PPP1R3B*, *MIXIPL*, *HNF4A*, *PCSK9*, *GALNT2*,

400 *HMGCR*) either because we lacked sufficient power to detect their effects, the effects  
401 are negligible in Samoans, or the allele frequencies of associated variants are different  
402 enough in Samoans to hinder detection. However, it is important to note that this study  
403 was not designed to evaluate the effect of known lipids loci in Samoans, nor were  
404 previously-associated loci examined specifically.

405

406 We detected and replicated a suggestive association between HDL and a variant  
407 on 5q35.3 (Fig 2A). While the peak SNP lies within an intron of *BTNL8*, the variant  
408 selected for follow-up genotyping is intergenic, downstream of *MGAT1*. A suggestive  
409 association between variants near *MGAT1* and HDL in a GWAS in the Micronesian  
410 population of Kosrae has been previously reported [10]. Although there is no evidence  
411 of association between *MGAT1* and lipids as reported in prior studies of non-Pacific  
412 Islanders, variation near *MGAT1* has been associated with BMI, serum fatty acid levels  
413 and composition, and glucose response in Europeans [37–39]. The encoded MGAT  
414 enzyme plays a major role in the absorption of dietary fat in the intestine [40]. Due to the  
415 greater frequency of the HDL-associated risk variant observed in Samoans compared to  
416 1000 Genomes populations, it is plausible that variation near *MGAT1* may have a  
417 unique role in or a stronger effect on the lipid metabolism of Pacific Islanders.

418

419 We also detected and replicated a novel suggestive association between HDL  
420 and a variant downstream of *RAB21* (Fig 2D). Unlike the variant downstream of  
421 *MGAT1*, we observed similar allele frequencies between Samoans and 1000 Genomes  
422 populations (i.e., < 20% difference between Samoans and another 1000 Genomes

423 population) in the HDL-associated variant downstream of *RAB21*. This region, 12q21,  
424 was previously seen in linkage analysis with both univariate and bivariate scans of TC  
425 and LDL [12]. The individuals included in this linkage analysis are also included in our  
426 2002–03 replication sample set, however, they do not appear to be driving the  
427 association signal near *RAB21* (Table S7 in S1 Appendix). Variation near *RAB21* has  
428 been previously associated with obesity [41]. *RAB21* belongs to the family of  
429 monomeric GTPases involved in control of cellular membrane trafficking and is involved  
430 in the targeted trafficking of integrins and the regulation of cell adhesion and migration  
431 [42, 43].

432

433         This study is limited in drawing conclusions about the genetic architecture of  
434 lipids in Samoans, as replication genotyping was unavailable for many loci and due to  
435 the lack of genome-wide imputation. Future studies, evaluating the evidence of  
436 association between associations seen here in separate cohorts as well fine-mapping  
437 loci with genotype imputation (given the availability of a relevant reference panel), are  
438 necessary to fully evaluate the genetic architecture of lipids in Samoans.

439

440         This is the first GWAS of lipid phenotypes in Samoans, and we observed  
441 association with many known lipid loci, which was further supported by the gene-set  
442 enrichment analysis highlighting lipid metabolism gene sets. However, the difference in  
443 association results near *APOE*, coupled with evidence of Pacific-Islander–specific  
444 associations with *MGAT1* and *RAB21* suggest that some, but not all, of the genetic  
445 architecture of lipids is shared between Samoans and other populations. Given this

446 evidence of a partially distinct genetic architecture of lipids in Samoans, further  
447 investigation and fine-mapping of lipid loci, especially that across multiple ethnicities, is  
448 warranted.

449

## 450 **Acknowledgements**

451         The authors would like to thank the Samoan participants of the study, local  
452 village authorities, and the many Samoan and other field workers over the years. We  
453 acknowledge the Samoan Ministry of Health, the Samoa Bureau of Statistics, and the  
454 American Samoan Department of Health for their support of this research. We give  
455 particular thanks to two research assistants, Melania Selu and Vaimoana Lupematasila,  
456 who contributed to the 2010 recruitment and continue to assist us in our work in Samoa.  
457

## 458 **References**

- 459 1. Hawley NL, Minster RL, Weeks DE, Viali S, Reupena MS, Sun G, Cheng H,  
460 Deka R, Mcgarvey ST (2014) Prevalence of adiposity and associated  
461 cardiometabolic risk factors in the samoan genome-wide association study. *Am J*  
462 *Hum Biol* 26:491–501
- 463 2. Keighley E., McGarvey ST, Quested C, Mccuddin C, Viali S, Maga UA (2007)  
464 Nutrition and health in modernizing Samoans: temporal trends and adaptive  
465 perspectives. In: Ohtsuka R, Ulijaszek SJ (eds) *Heal. Chang. Asia-Pacific Reg.*  
466 *Biocultural Epidemiol. Approaches*. Cambridge University Press, Cambridge, NY,  
467 pp 147–191
- 468 3. McGarvey ST (2001) Cardiovascular disease (CVD) risk factors in Samoa and  
469 American Samoa, 1990-95. *Pac Health Dialog* 8:157–62
- 470 4. Kannel WB, Castelli WP, Gordon T, McNamara PM (1971) Serum cholesterol,  
471 lipoproteins, and the risk of coronary heart disease. The Framingham study. *Ann*  
472 *Intern Med* 74:1–12
- 473 5. Gordon T, Castelli WP, Hjortland MC, Kannel WB, Dawber TR (1977) High  
474 density lipoprotein as a protective factor against coronary heart disease. The  
475 Framingham Study. *Am J Med* 62:707–14
- 476 6. Roeters van Lennep J, Westerveld HT, Erkelens DW, van der Wall EE (2002)  
477 Risk factors for coronary heart disease: implications of gender. *Cardiovasc Res*  
478 53:538–549
- 479 7. Lange LA, Willer CJ, Rich SS (2015) Recent developments in genome and  
480 exome-wide analyses of plasma lipids. *Curr Opin Lipidol* 26:96–102
- 481 8. Willer CJ, Schmidt EM, Sengupta S, et al (2013) Discovery and refinement of loci  
482 associated with lipid levels. *Nat Genet* 45:1274–1283
- 483 9. Burkhardt R, Kenny EE, Lowe JK, et al (2008) Common SNPs in HMGCR in  
484 micronesians and whites associated with LDL-cholesterol levels affect alternative  
485 splicing of exon13. *Arterioscler Thromb Vasc Biol* 28:2078–2084
- 486 10. Lowe JK, Maller JB, Pe'er I, et al (2009) Genome-wide association studies in an  
487 isolated founder population from the Pacific Island of Kosrae. *PLoS Genet*  
488 5:e1000365
- 489 11. Dumitrescu L, Carty CL, Taylor K, et al (2011) Genetic determinants of lipid traits  
490 in diverse populations from the population architecture using genomics and  
491 epidemiology (PAGE) study. *PLoS Genet* 7:e1002138
- 492 12. Åberg K, Dai F, Sun G, et al (2008) A genome-wide linkage scan identifies  
493 multiple chromosomal regions influencing serum lipid levels in the population on  
494 the Samoan islands. *J Lipid Res* 49:2169–2178
- 495 13. Minster RL, Hawley NL, Su C-T, et al (2016) A thrifty variant in CREBRF strongly  
496 influences body mass index in Samoans. *Nat Genet* 48:1049–1054
- 497 14. Kristiansson K, Naukkarinen J, Peltonen L (2008) Isolated populations and  
498 complex disease gene identification. *Genome Biol* 9:109
- 499 15. Laurie CC, Doheny KF, Mirel DB, et al (2010) Quality control and quality  
500 assurance in genotypic data for genome-wide association studies. *Genet*  
501 *Epidemiol* 34:591–602



- 502 16. Deka R, Mc Garvey ST, Ferrell RE, Kamboh MI, Yu LM, Aston CE, Jin L,  
503 Chakraborty R (1994) Genetic characterization of American and Western  
504 Samoans. *Hum Biol* 66:805–22
- 505 17. McGarvey ST, Levinson PD, Bausser-Man L, Galanis DJ, Hornick CA (1993)  
506 Population change in adult obesity and blood lipids in American Samoa from  
507 1976–1978 to 1990. *Am J Hum Biol* 5:17–30
- 508 18. Chin-Hong P V, McGarvey ST (1996) Lifestyle incongruity and adult blood  
509 pressure in Western Samoa. *Psychosom Med* 58:131–7
- 510 19. Galanis DJ, McGarvey ST, Qusteded C, Sio B, Afele-Fa'amuli SA (1999) Dietary  
511 intake of modernizing Samoans: implications for risk of cardiovascular disease. *J*  
512 *Am Diet Assoc* 99:184–90
- 513 20. Åberg K, Dai F, Sun G, et al (2009) Susceptibility Loci for Adiposity Phenotypes  
514 on 8p, 9p, and 16q in American Samoa and Samoa. *Obesity* 17:518–524
- 515 21. Dai F, Keighley ED, Sun G, et al (2007) Genome-wide scan for adiposity-related  
516 phenotypes in adults from American Samoa. *Int J Obes* 31:1832–1842
- 517 22. Åberg K, Dai F, Viali S, Tuitele J, Sun G, Indugula SR, Deka R, Weeks DE,  
518 McGarvey ST (2009) Suggestive linkage detected for blood pressure related traits  
519 on 2q and 22q in the population on the Samoan islands. *BMC Med Genet* 10:107
- 520 23. Dai F, Sun G, Åberg K, et al (2008) A Whole Genome Linkage Scan Identifies  
521 Multiple Chromosomal Regions Influencing Adiposity-Related Traits among  
522 Samoans. *Ann Hum Genet* 72:780–792
- 523 24. Chen W-M, Abecasis GR (2007) Family-Based Association Tests for  
524 Genomewide Association Scans. *Am J Hum Genet* 81:913–926
- 525 25. Devlin B, Roeder K (1999) Genomic control for association studies. *Biometrics*  
526 55:997–1004
- 527 26. Purcell S, Cherny SS, Sham PC (2003) Genetic Power Calculator: design of  
528 linkage and association genetic mapping studies of complex traits. *Bioinformatics*  
529 19:149–150
- 530 27. Carithers LJ, Ardlie K, Barcus M, et al (2015) A Novel Approach to High-Quality  
531 Postmortem Tissue Procurement: The GTEx Project. *Biopreserv Biobank* 13:311–  
532 319
- 533 28. Segrè A V, Groop L, Mootha VK, Daly MJ, Altshuler D (2010) Common Inherited  
534 Variation in Mitochondrial Genes Is Not Enriched for Associations with Type 2  
535 Diabetes or Related Glycemic Traits. *PLoS Genet* 6:e1001058
- 536 29. Lee PH, O'Dushlaine C, Thomas B, Purcell SM (2012) INRICH: interval-based  
537 enrichment analysis for genome-wide association studies. *Bioinformatics*  
538 28:1797–1799
- 539 30. Teslovich TM, Musunuru K, Smith A V., et al (2010) Biological, clinical and  
540 population relevance of 95 loci for blood lipids. *Nature* 466:707–713
- 541 31. Aulchenko YS, Ripke S, Isaacs A, van Duijn CM (2007) GenABEL: an R library for  
542 genome-wide association analysis. *Bioinformatics* 23:1294–1296
- 543 32. R Core Team (2014) R: A language and environment for statistical computing.
- 544 33. Therneau T, Atkinson E, Sinnwell J, Schaid D, McDonnell S (2014) kinship2:  
545 Pedigree functions.
- 546 34. Winkler TW, Day FR, Croteau-Chonka DC, et al (2014) Quality control and  
547 conduct of genome-wide association meta-analyses. *Nat Protoc* 9:1192–1212

- 548 35. Willer CJ, Li Y, Abecasis GR (2010) METAL: fast and efficient meta-analysis of  
549 genomewide association scans. *Bioinformatics* 26:2190–2191
- 550 36. Pruim RJ, Welch RP, Sanna S, Teslovich TM, Chines PS, Gliedt TP, Boehnke M,  
551 Abecasis GR, Willer CJ (2010) LocusZoom: regional visualization of genome-wide  
552 association scan results. *Bioinformatics* 26:2336–2337
- 553 37. Johansson Å, Marroni F, Hayward C, et al (2010) Linkage and Genome-wide  
554 Association Analysis of Obesity-related Phenotypes: Association of Weight With  
555 the MGAT1 Gene. *Obesity* 18:803–808
- 556 38. Jacobsson JA, Rask-Andersen M, Risérus U, et al (2012) Genetic variants near  
557 the MGAT1 gene are associated with body weight, BMI and fatty acid metabolism  
558 among adults and children. *Int J Obes* 36:119–129
- 559 39. Del-Aguila JL, Beitelshes AL, Cooper-DeHoff RM, Chapman AB, Gums JG,  
560 Bailey K, Gong Y, Turner ST, Johnson JA, Boerwinkle E (2014) Genome-wide  
561 association analyses suggest NELL1 influences adverse metabolic response to  
562 HCTZ in African Americans. *Pharmacogenomics J* 14:35–40
- 563 40. Yen C-LE, Stone SJ, Cases S, Zhou P, Farese R V. (2002) Identification of a  
564 gene encoding MGAT1, a monoacylglycerol acyltransferase. *Proc Natl Acad Sci*  
565 99:8512–8517
- 566 41. Turcot V, Lu Y, Highland HM, et al (2018) Protein-altering variants associated with  
567 body mass index implicate pathways that control energy intake and expenditure in  
568 obesity. *Nat Genet* 50:26–41
- 569 42. Pellinen T, Ivaska J (2006) Integrin traffic. *J Cell Sci* 119:3723–31
- 570 43. Pellinen T, Tuomi S, Arjonen A, et al (2008) Integrin trafficking regulated by  
571 Rab21 is necessary for cytokinesis. *Dev Cell* 15:371–85
- 572
- 573

574 **Supporting Information**

575 **S1 Appendix. Supporting Information.**

576

577

578 **Data Availability Statement**

579 The discovery cohort data are available from dbGaP (accession number:

580 phs000914.v1.p1).

581

582

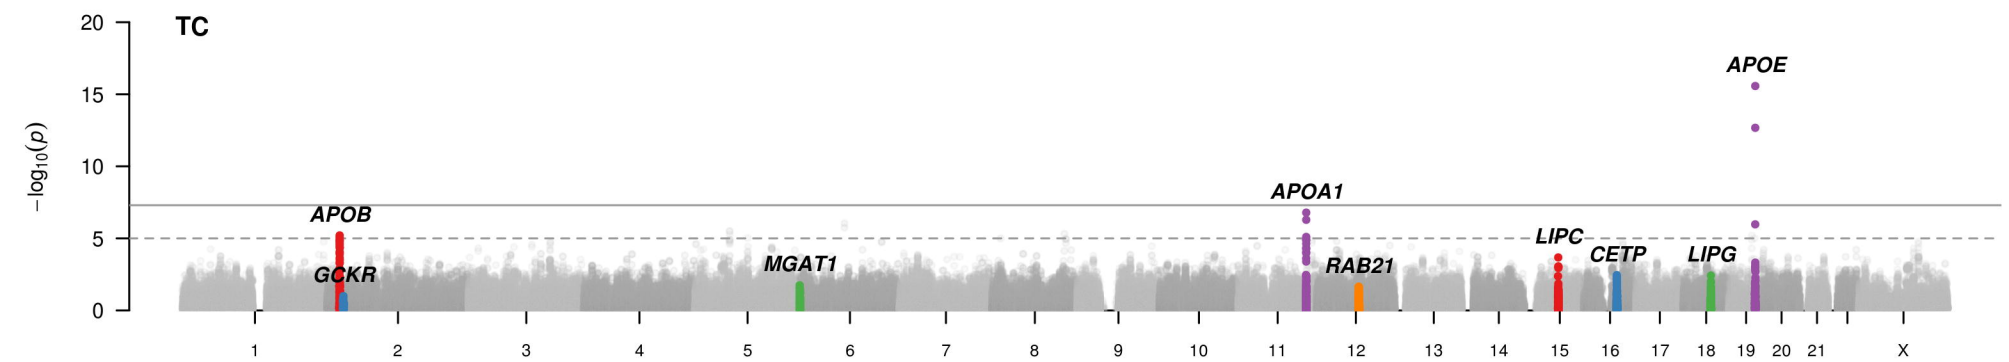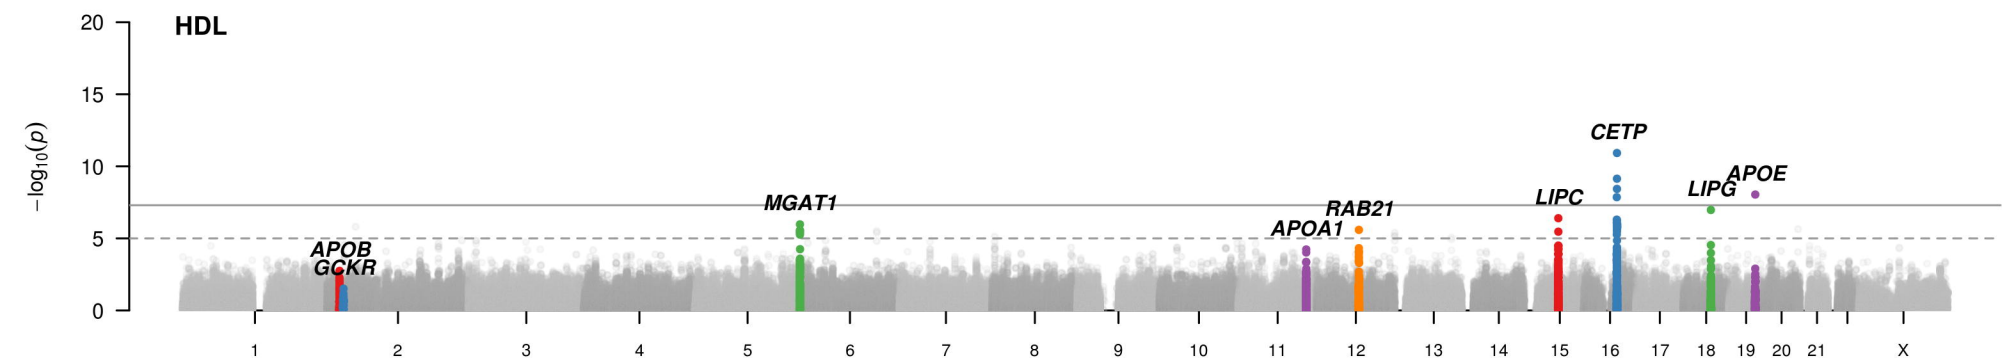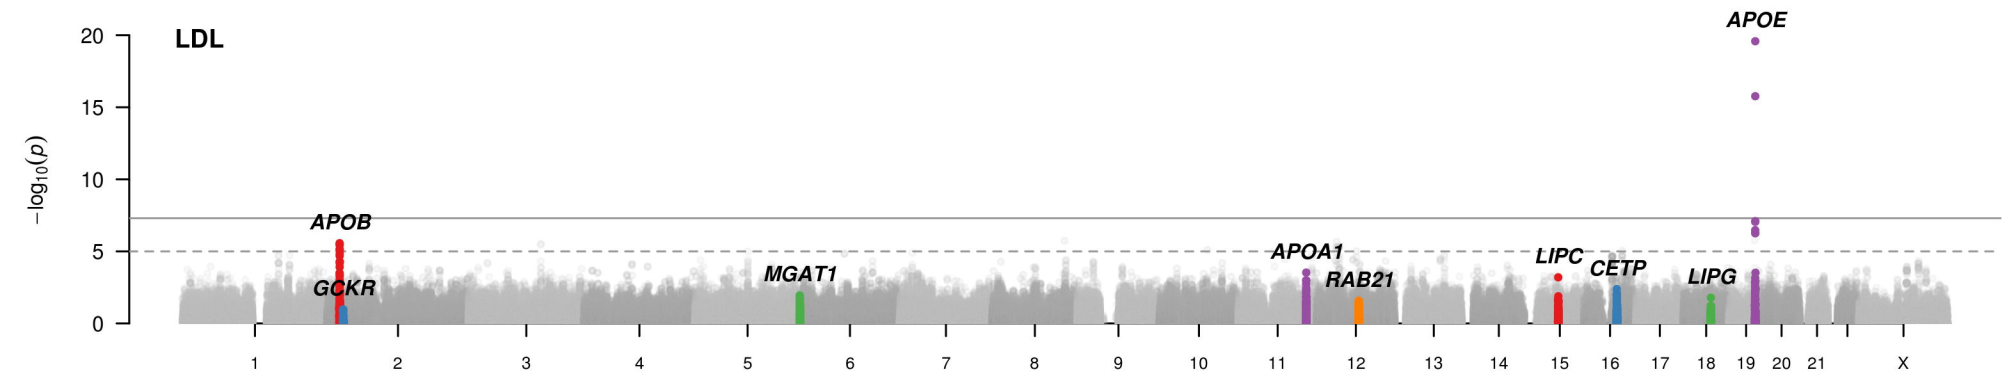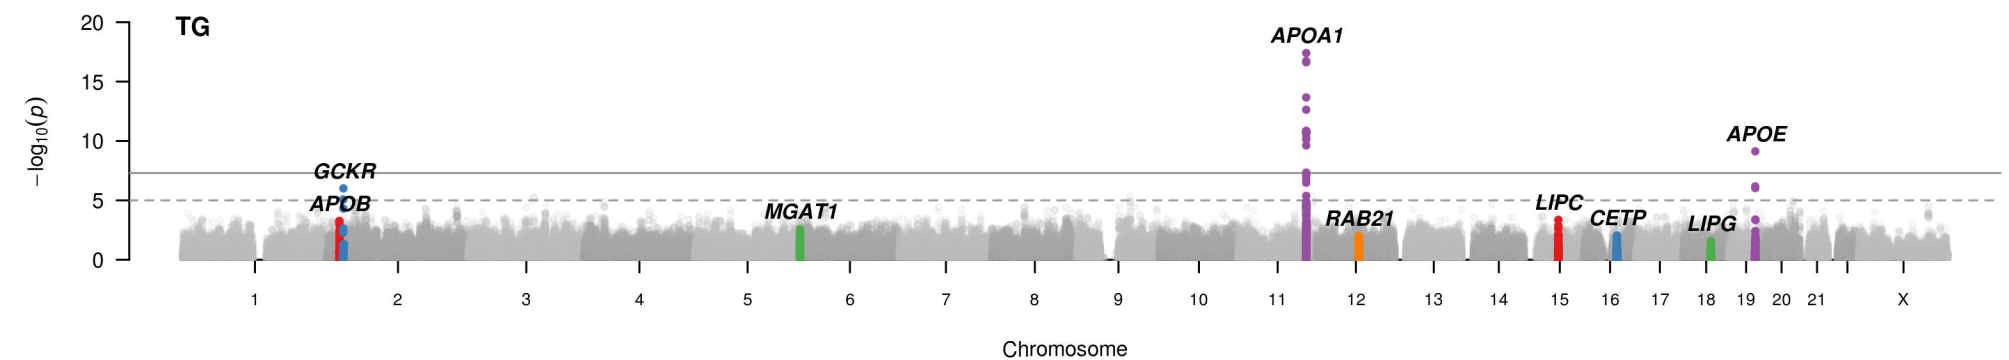

Chromosome

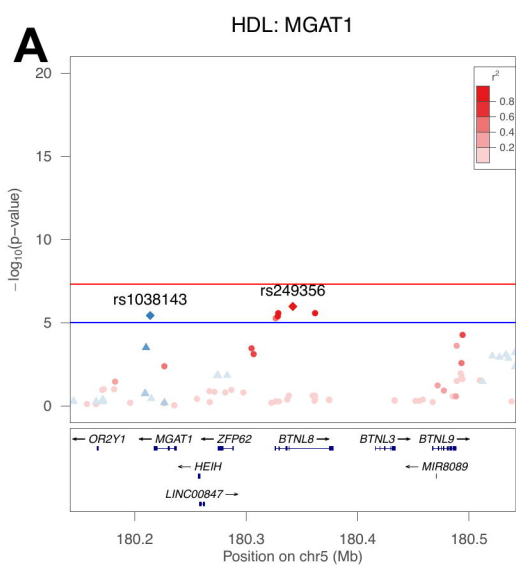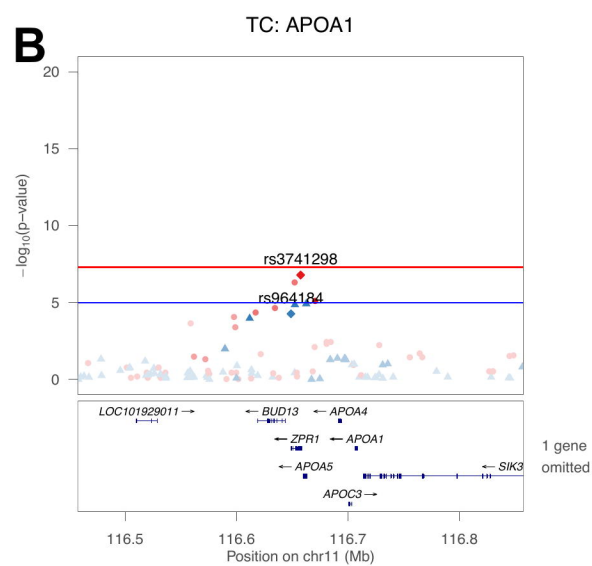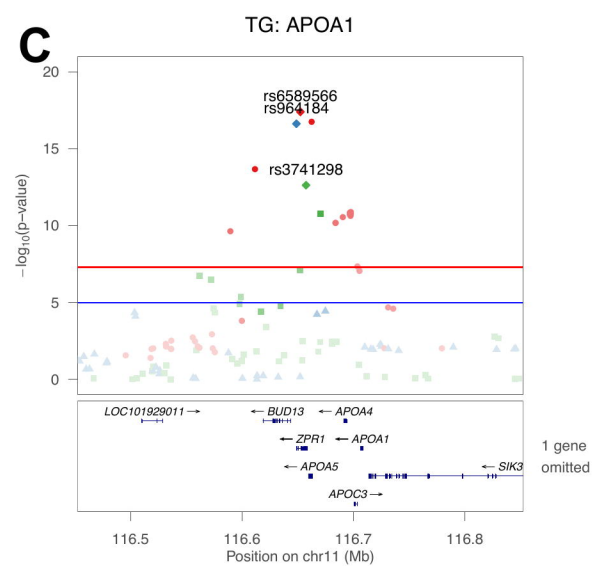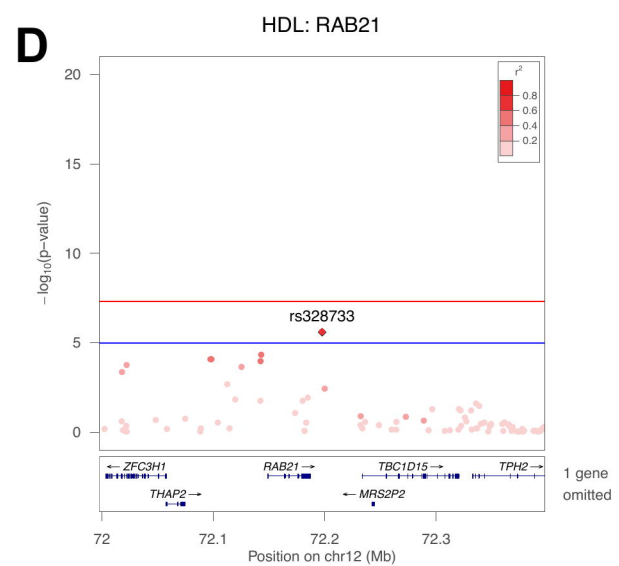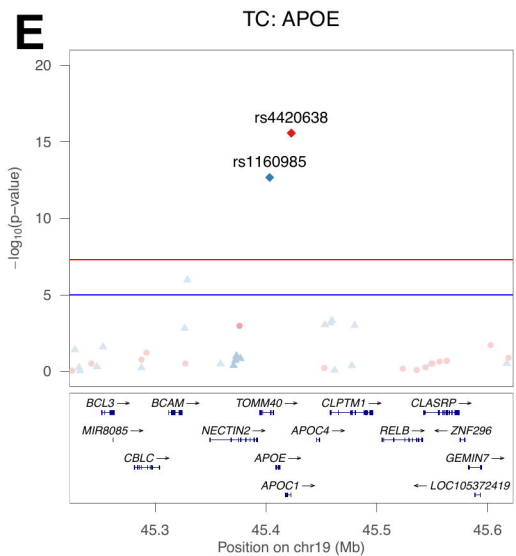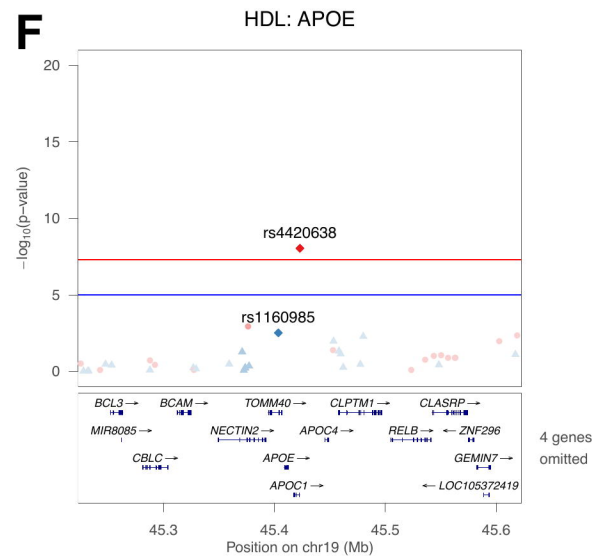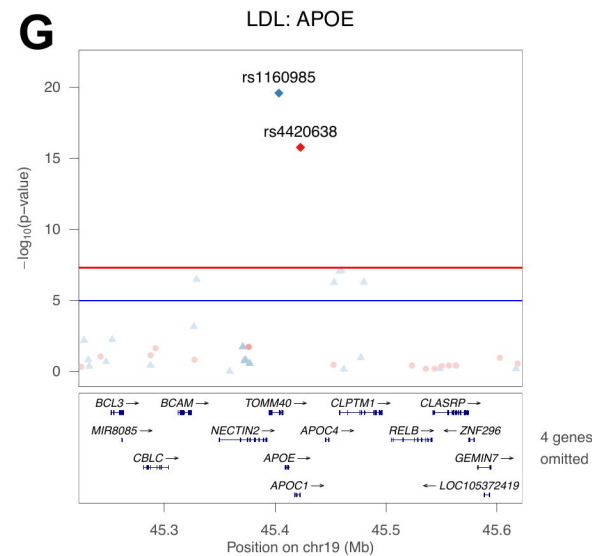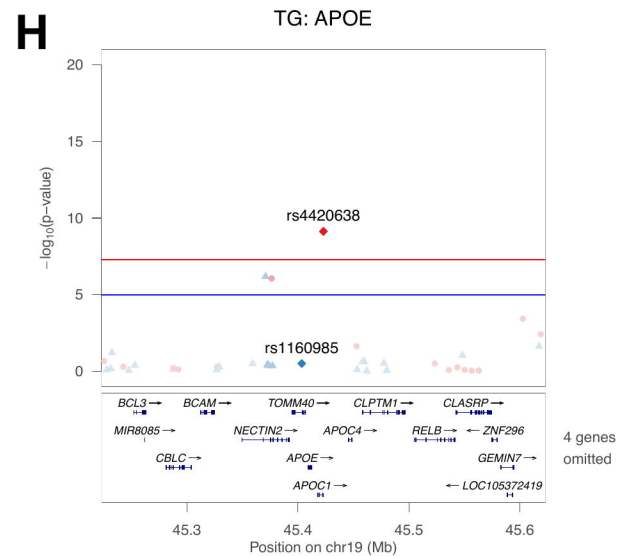

Source: https://www.biorxiv.org/content/10.1101/411546v3.full.pdf
